# Oncogenetic Network Estimation with Disjunctive Bayesian Networks

Phillip B. Nicol<sup>a</sup>, Kevin R. Coombes<sup>b</sup>, Courtney Deaver<sup>c</sup>, Oksana Chkrebti<sup>1</sup>, Subhadeep Paul<sup>1</sup>,  
Amanda E. Toland<sup>e</sup>, Amir Asiaee<sup>f,\*</sup>

<sup>a</sup>Harvard College, Cambridge, MA 02138, USA.

<sup>b</sup>Dept. of Biomedical Informatics, Ohio State University, Columbus, OH 43210

<sup>c</sup>Natural Sciences Division, Pepperdine University, Malibu, CA 90263

<sup>d</sup>Dept. of Statistics, Ohio State University, Columbus, OH 43210

<sup>e</sup>Dept. of Cancer Biology and Genetics and Dept. of Internal Medicine, Division of Human Genetics, Comprehensive Cancer Center, Ohio State University, Columbus, OH, 43420

<sup>f</sup>Mathematical Biosciences Institute, Ohio State University, Columbus, OH 43210

---

## Abstract

**Motivation:** Cancer is the process of accumulating genetic alterations that confer selective advantages to tumor cells. The order in which aberrations occur is not arbitrary, and inferring the order of events is challenging due to the lack of longitudinal samples from tumors. Moreover, a network model of oncogenesis should capture biological facts such as distinct progression trajectories of cancer subtypes and patterns of mutual exclusivity of alterations in the same pathways.

In this paper, we present the Disjunctive Bayesian Network (DBN), a novel oncogenetic model with a phylogenetic interpretation. DBN is expressive enough to capture cancer subtypes' trajectories and mutually exclusive relations between alterations from unstratified data.

**Results:** In cases where the number of studied alterations is small ( $< 30$ ), we provide an efficient dynamic programming implementation of an exact structure learning method that finds a best DBN in the super-exponential search space of networks. In rare cases that the number of alterations is large, we provided an efficient genetic algorithm in our software package, OncoBN. Through numerous synthetic and real data experiments, we show OncoBN's ability in inferring ground truth networks and recovering biologically meaningful progression networks.

**Availability:** OncoBN is implemented in R and is available at <https://github.com/phillipnicol/OncoBN>.

**Keywords:** cancer progression, Bayesian network, oncogenetic model, tumor phylogenetic

---

\*Corresponding author. Email: [asiaeetaheri.1@osu.edu](mailto:asiaeetaheri.1@osu.edu)

## 13 1. Introduction

14 Cancer is the process of accumulating molecular alterations that over time lead to cancer  
15 hallmarks ([Hanahan and Weinberg, 2011](#)). A natural question to ask is whether the order of alter-  
16 ations follows a particular pattern. Phylogenetic tree reconstruction methods answer this problem  
17 for individual tumors ([Altrock et al., 2015](#)). However, historically, due to the lack of high-resolution  
18 multi-region data of individual tumors, oncogenetic models were considered first. Oncogenetic  
19 models of tumorigenesis utilize many samples from the population of patients to estimate the order  
20 of alterations occur at the **disease** level, but are silent about the order of events at the **individual**  
21 **tumor** and **cell** levels. Recent technologies has enabled researchers to delineate various modes  
22 of evolution ([Davis et al., 2017](#)) and depict tumors' evolutionary history in an unprecedented reso-  
23 lution ([Gerstung et al., 2020](#)). Although high-resolution data from individual tumors helps infer the  
24 tumor's history, they do not provide the big picture of how a specific cancer type evolves. *In this*  
25 *work, we are taking first steps to reconciling these two levels of cancer progression modeling.*

26 The first oncogenetic model of tumorigenesis by [Fearon and Vogelstein, 1990](#) was developed  
27 for colon cancer and suggested that a *chain* of aberrations is required to transform normal cells  
28 into carcinoma. Desper's *Oncogenetic trees* ([Desper et al., 1999](#)) modeled progression as a  
29 rooted directed tree. Mixtures of oncogenetic trees ([Beerenwinkel et al., 2005b,a](#)) were proposed  
30 to capture the presence of an aberration in multiple progression paths. *Directed Acyclic Graphs*  
31 (**DAGs**) are the next straightforward generalization of tree-based models, as they allow multiple  
32 alterations (parents) to set up the clonal stage for the appearance of a new aberration (the child).  
33 *Bayesian networks (BN)*, which are DAGs equipped with a joint probability distribution ([Barber,](#)  
34 [2012](#)), lend themselves naturally to representing such models. Perhaps the most famous BN  
35 model of cancer progression is the *Conjunctive Bayesian Network (CBN)* ([Beerenwinkel et al.,](#)  
36 [2007](#); [Gerstung et al., 2009](#)) which assumes all parent aberrations must be present in order for a  
37 child to occur.

38 The evolutionary interpretation of oncogenetic graphs is challenging. The most concrete bi-  
39 ological way of thinking about an edge  $e = (v, u)$  in such DAGs is to assume mutation  $v$  fixates  
40 in the cell population and prepares the tumor for the next selective sweep by  $u$  ([Gerstung et al.,](#)  
41 [2009](#)). In other words, all mutations are assumed to be clonal, which is not accurate because of  
42 the observed intratumor heterogeneity in many cancer types ([Dagogo-Jack and Shaw, 2018](#)). *Our*  
43 *proposed tumorigenesis model has a phylogenetic interpretation and accommodates the presence*  
44 *of sub-clonal alterations.*

45 At its core, inferring cancer progression networks is the BN structure learning problem, which  
46 is NP-hard (Koller and Friedman, 2009). Various approximation and search algorithms have been  
47 proposed for cancer progression inference (Gerstung et al., 2009; Montazeri et al., 2016b; Fara-  
48 hani and Lagergren, 2013). These algorithms' objective is to find a network structure that maxi-  
49 mizes a (regularized) likelihood. The optimal network learned by any approximation method may  
50 be far from the ground truth and iterative search methods can get trapped in local maximums. *Here*  
51 *we show that for the number of driver alterations that we often encounter in tumors ( $< 30$ ), one*  
52 *can use an efficient dynamic programming implementation of an exact structure learning algorithm*  
53 (Silander and Myllymäki, 2006).

## 54 1.1. Related Work

55 Mutual exclusivity of alterations is another phenomenon that was considered in learning cancer  
56 progression networks. Two sets of alterations are mutually exclusive if they (almost) never cooccur  
57 in a tumor (Leiserson et al., 2015). Two potential explanations for this observation are functional  
58 redundancy and synthetic lethality (Deng et al., 2019). Existing approaches considering pathways  
59 and their effects on cancer progression either assume that the pathways are inputs of the progres-  
60 sion inference algorithm (Gerstung et al., 2011; Cheng et al., 2012) or learn them along with the  
61 progression network (Raphael and Vandin, 2015; Cristea et al., 2017).

62 The CBN progression rule dictates that all parent alterations need to be present in the tumor  
63 for the child to occur, under which mutually exclusive genes cannot share any descendant alter-  
64 ations. CBN's inability to capture mutual exclusivity of alterations has motivated a line of work in  
65 which the mutual exclusivity restriction and pathway information are introduced artificially to the  
66 CBN (Gerstung et al., 2011; Cheng et al., 2012). Moreover, since each cancer subtype has dis-  
67 tinct molecular characteristics and progression paths, one must first stratify samples to disjoint  
68 subtypes and then learn each subtype's progression network separately. This extra step is re-  
69 quired for all of the above models mainly because they cannot naturally capture subtypes' mutual  
70 exclusivity. PICNIC (Caravagna et al., 2016) is the state-of-the-art pipeline that clusters samples  
71 to subtypes, detects driver events, checks for statistically significant mutual exclusivity hypotheses  
72 or takes pathway information as an input, and infers the progression network.

73 Several recent works attempt to model the accumulation of alterations by Suppes' probability  
74 raising causal framework (Olde Loohuis et al., 2014; Ramazzotti et al., 2015; Caravagna et al.,  
75 2016; De Sano et al., 2016; Ramazzotti et al., 2018). Farahani and Lagergren, 2013 proposed

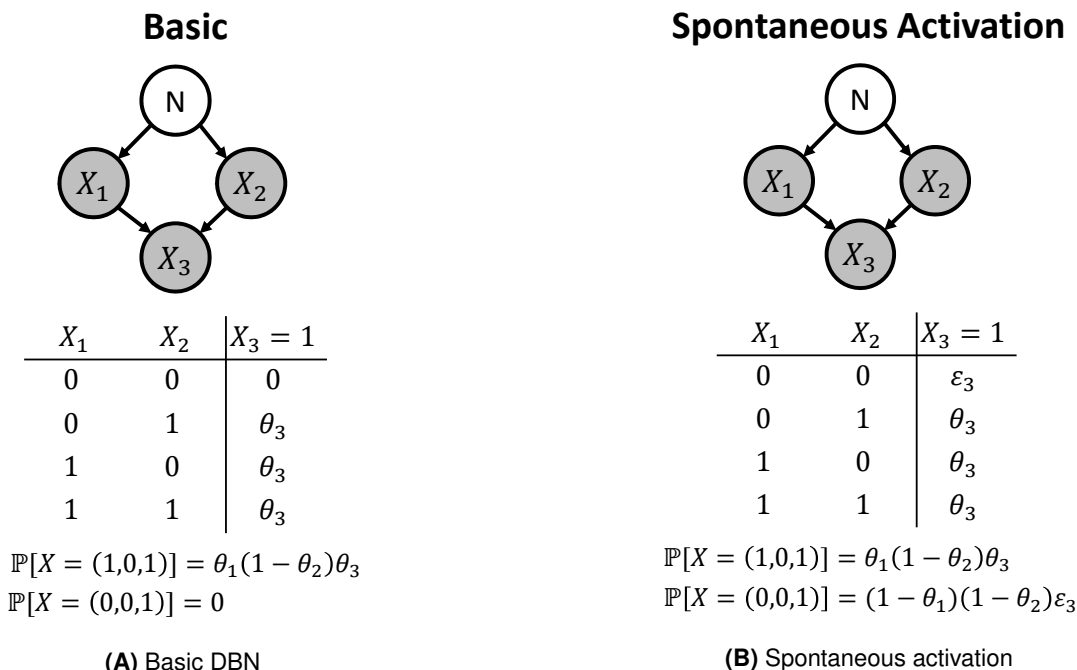

**Figure 1: Bayesian networks of the cancer progression models investigated.** Node  $N$  represents normal cell state, and each random variable  $X_j$  is an observed alteration, and the corresponding progression probability parameter is  $\theta_j$ . In all models, the conditional probability table of  $X_3$  is shown, and probabilities of instance observations are computed. **(A)** Basic DBN model where further progression is impossible if none of the parent alterations have occurred. **(B)** Spontaneous activation model where there is a non-zero chance of a child occurring even if none of its parents are active.

76 (semi-)monotone progression networks without any biological interpretation. The class of monotone  
 77 BNs is a superset of our proposed model which makes it more flexible but prone to overfitting due  
 78 to lack of enough samples in many real-world scenarios.

## 79 1.2. Our Contribution

80 **Biological Modeling.** We propose the Disjunctive Bayesian Network (**DBN**), which recon-  
 81 ciles population-level progression models (oncogenetic models) and individual tumor evolution  
 82 models (phylogenetic models). From the oncogenetic perspective, DBN relaxes the CBN progres-  
 83 sion assumption by allowing progression even if one of parents has occurred, Figure 1A. From  
 84 the phylogenetic perspective, each directed path starting from the wild-type root in a DBN graph  
 85 represents a (sub)clone, Figure 2C, and each sample from the DBN graph represents an indi-  
 86 vidual tumor consisting of (sub)clones, Figure 2B. Overall, the DBN itself is the overlay of all of  
 87 the possible sub-clones corresponding to the modeled cancer, Figure 2A. The DBN can naturally

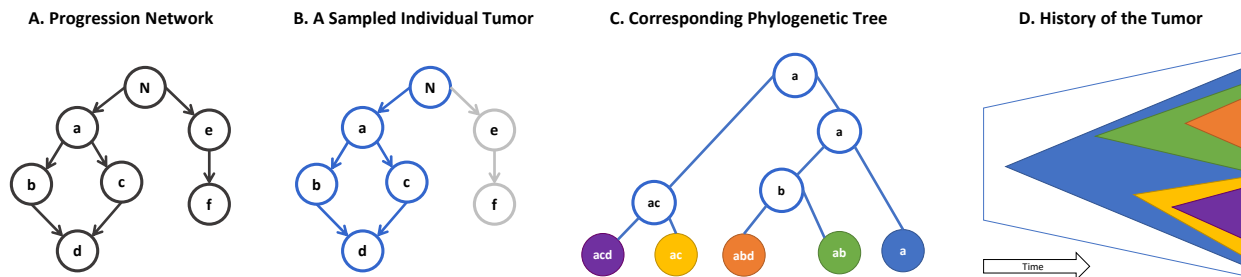

**Figure 2: Phylogenetic interpretation of the DBN model.** **A.** A DBN progression network that models a cancer type at the population level (disease level). Root  $N$  represents the wild type state (Normal) and there are six known driver alterations. **B.** A sample from the network (blue nodes) that represents an individual tumor. **C.** The corresponding phylogenetic tree of the sample. Each path of sampled graph forms a subclone living on the leaves of the phylogenetic tree that are distinguished by various colors. **D.** Visualization of the tumor history and the subclonal relationships through time.

88 accommodate distinct progression paths for subtypes and is expressive enough to capture the mu-  
89 tual exclusivity of alterations present in the data. Therefore, one can skip two preprocessing steps  
90 necessary for the state-of-the-art models: stratifying samples by subtype and mutual exclusivity  
91 detection. We consider two extensions of DBN. The first extension relaxes the strict disjunction  
92 assumption and allows spontaneous (parent-less) alteration, Figure 1B. The second extension di-  
93 rectly models measurement error of alterations. To have an uncluttered presentation, we present  
94 the measurement error model only in the Supplement A.

95 **Computational Efficiency.** We provide an efficient Dynamic Programming (**DP**) implementa-  
96 tion of an exact structure learning method (Silander and Myllymäki, 2006) that learns the optimal  
97 DBN (in terms of a regularized likelihood). Additionally, this algorithm can be incorporated into  
98 existing cancer progression frameworks such as Conjunctive Bayesian Networks (Gerstung et al.,  
99 2009) or CAPRI (Ramazzotti et al., 2015), which will likely improve their accuracies. For rare  
100 cases that the studied driver alterations are numerous, we provided an efficient Genetic Algorithm  
101 (**GA**) in our software package. To speed up the GA's global search, we characterize a likelihood-  
102 equivalence relation over DBNs and only search through the representative DAGs of each class.

103 **Experimental Performance.** Through numerous synthetic and real data experiments, we  
104 show the ability of our algorithms in reconstructing ground truth progression networks from simu-  
105 lated samples and inferring biologically interpretable progression networks for cutaneous melanoma,  
106 lung adenocarcinoma, and bladder cancer. Our scalable **Oncogenetic Bayesian Network R** pack-  
107 age, **OncoBN**, provides two easy to use routines (approximate and exact) for estimation of onco-

108 genetic Bayesian networks including DBN and CBN.

## 109 2. Methods

110 We model the observation of alterations as a binary random vector  $(X_1, \dots, X_p)$ , where  $X_j = 1$   
 111 if the  $j$ -th alteration is detected in the sample and  $\mathbf{x} = (x_1, \dots, x_p)$  is an observed sample. We  
 112 assume that a BN governs the order in which the events can occur. The BN consists of a DAG  $G$   
 113 and local *Conditional Probability Distributions (CPD)*  $\mathbb{P}(x_j|\mathbf{x}(\mathcal{P}_j); \theta)$  where  $\mathcal{P}_j$  is the set of parents  
 114 of event  $j$  in  $G$  and  $\theta$  parameterizes the distribution. Local CPDs form the joint distribution as  
 115  $\mathbb{P}(\mathbf{x}; G, \theta) = \prod_{j=1}^p \mathbb{P}(x_j|\mathbf{x}(\mathcal{P}_j); \theta)$ .

### 116 2.1. Progression Rule and Parameter Estimation

117 **Basic DBN.** The DBN progression rule asserts that an event  $j$  occurs with probability  $\theta_j$  if and  
 118 only if at least one of its parents have occurred. Therefore,  $\mathbb{P}(x_j = 1|\mathbf{x}(\mathcal{P}_j); \theta) = 0$  if parents are  
 119 inactive and  $\theta_j$  otherwise, Figure 1A.

120 **Spontaneous Activation Model.** The deviation from the DBN progression rule may be the re-  
 121 sults of *spontaneous activation* caused by unknown sources. To capture that, we add a non-zero  
 122 spontaneous activation probability  $\varepsilon_j > 0$  for each node, Figure 1B.

Given  $n$  cross-sectional samples and the network  $G$ , we wish to find  $\hat{\theta}_G$ , the maximum likeli-  
 hood estimator (MLE) for  $\theta$ . We focus on the spontaneous activation model, where the likelihood  
 is:

$$\mathcal{L}(\theta, G) = \mathbb{P}(\mathbf{x}; \theta, G) = \prod_{j=1}^p [\theta_j^{x_j} (1 - \theta_j)^{1-x_j}] \mathbf{1}(\mathbf{x}(\mathcal{P}_j) \neq \mathbf{0}) \varepsilon_j^{\mathbf{1}(\mathbf{x}(\mathcal{P}_j) = \mathbf{0})}. \quad (1)$$

123 Maximizing the log-likelihood results in  $\hat{\theta}_j^G = \frac{\sum_{i=1}^n \mathbf{1}(\mathbf{x}_{ij}=1, \mathbf{x}_i(\mathcal{P}_j) \neq \mathbf{0})}{\sum_{i=1}^n \mathbf{1}(\mathbf{x}_i(\mathcal{P}_j) \neq \mathbf{0})}$  and where  $x_{ij}$  is the realization of  
 124 the  $j$ th event in the  $i$ th sample. From now on, to reduce the number of inferred parameters, we  
 125 assume  $\forall j : \varepsilon_j = \varepsilon$  and we fix it throughout the experiments. Details of parameter estimation for  
 126 the three models (basic, spontaneous, measurement error) are presented in Supplement B.

### 127 2.2. Exact Structure Learning

128 Although for a fixed network  $G$  the MLE parameters have closed form, finding the best  $G$  is  
 129 NP-hard. We present an efficient Dynamic Programming (DP) method for  $p < 30$  that finds a best  
 130 graph with maximum likelihood. We use "a best" instead of "the best" graph to emphasize on the  
 131 fact that the graph with the maximum likelihood is not unique.

To have more interpretability and avoid overfitting, we restrict our search space to the space of  $p$ -node DAGs with an in-degree bound of  $k$ ,  $\mathcal{G}_{p,k}$ . To further penalize dense graphs, we follow (Ramazzotti et al., 2015) and use the Bayesian information criterion (BIC) as our graph fitness score. The final optimization objective takes the following form:

$$\max_{G \in \mathcal{G}_{p,k}} \text{BIC}(G, \hat{\theta}^G), \quad \text{BIC}(G, \hat{\theta}^G) \triangleq \ell(G, \hat{\theta}^G) - \frac{\log(N)}{2} |E|. \quad (2)$$

### 132 2.2.1. Dynamic Programming Algorithm

133 An exhaustive search of  $\mathcal{G}_{p,k}$  takes super-exponential time. Silander and Myllymäki, 2006  
 134 introduced a dynamic programming algorithm that can find the optimal network in exponential time.  
 135 Their algorithm assumes that each graph  $G$  can be assigned a decomposable score  $\text{Score}(G)$   
 136 such that  $\text{Score}(G) = \sum_{j=1}^p \text{Score}_j(\mathcal{P}_j)$  where  $\text{Score}_j(\mathcal{P}_j)$  is the score of the subgraph consisting  
 137 of only vertex  $j$  and its parents  $\mathcal{P}_j$ .  $\text{Score}_j(\mathcal{P}_j)$  is called the local score of  $j$ . For us,  $\text{Score}(G) =$   
 138  $\text{BIC}(G, \hat{\theta}^G)$ , is our decomposable score. The rest of this section is devoted to a high-level summary  
 139 of the algorithm.

**Optimal Substructure.** First note that each DAG has at least one sink node, which is a node with no outgoing edges. The score of a best graph  $G^*(V)$  can be broken down to the best parents of any of its sinks  $s$  and a best subgraph obtained by removing  $s$  and its incoming edges. More formally, for  $s$ , an arbitrary sink of  $G^*$ ,  $\mathcal{P}_s^*$  should be a best set of parents, i.e., has highest local score  $\mathcal{P}_s^* = \text{argmax}_{\mathcal{P}_s} \text{Score}_s(\mathcal{P}_s)$ . In addition, for  $G^*(V)$  to be optimal,  $\text{Score}(G^*(V \setminus \{s\}))$  should also be optimal. This optimal substructure suggests the following recursive formula for finding a best sink for set of nodes  $W \subseteq V$ :

$$\text{Sink}^*(W) = \text{argmax}_{s \in W} \text{Score}_s(\mathcal{P}_s^*(W)) + \text{Score}(G^*(W \setminus \{s\})), \quad (3)$$

140 where  $\mathcal{P}_s^*(W) = \text{argmax}_{\mathcal{P}_s \in W} \text{Score}_s(\mathcal{P}_s)$  is the pre-computed best parents of  $s$  in  $W$ . Best  
 141 sinks can be computed in  $O(n2^{n-1})$  time using memoization.

142 **Reconstructing an Optimal Solution.** Best sinks immediately result in a best ordering of nodes  
 143 in reverse order. By having an optimal order and the best set of parents for all nodes, it is straight-  
 144 forward to build an optimal graph. Starting from an empty graph, we add a node according to the  
 145 optimal order and add incoming edges from its optimal parents that preexist in the graph.

146 **Computational Complexity.** The most intensive portion of the algorithm is computing the set of  
 147 best parents  $\mathcal{P}_s^*(W)$  for every  $W \subseteq V \setminus \{s\}$ . This step requires  $O(n^2 2^{n-1})$  time and  $O(n2^{n-1})$

148 space. By leveraging disk space, it is possible to implement the algorithm such that at most  $2^{n+2}$   
 149 bytes of RAM are occupied at any given time.

## 150 2.2.2. Pruning Spurious Edges

151 When the data is corrupted by noise, the estimated graph is likely to contain spurious edges. To  
 152 remove low confidence edges, we perform statistical tests on the estimated graph. In DBNs, if  $e =$   
 153  $(u, v)$  is an edge in the ground-truth graph, we have  $\mathbb{P}(X_u = 1 | X_v = 1) > \mathbb{P}(X_u = 1 | X_v = 0)$ .  
 154 Thus, we use the Fisher’s exact test to check the inequality and retain edges for which the inequal-  
 155 ity holds with high confidence.

---

### Algorithm 1 Genetic Algorithm of OncoBN Package

---

```

1: input: Data set  $\mathcal{D}$ , parameters  $C, T$ , and  $r \geq 0$ .
2: output: Inferred graph  $\hat{G}$ 
3: Generate population of random trees:  $\mathcal{S}_0 = \{G_i^0\}_{i=1}^{2^C}$ .
4: for  $t = 1$  to  $T$  do
5:   Compute fitness score of each DAG as:  $v_i^t = \ell(G_i^t; \hat{\theta}_{G_i^t}^{\text{MLE}}, \mathcal{D})$ 
6:   if  $r = 0$  then ▷ MDL penalty
7:      $v_i^t = v_i^t + \log n \log p \sum_{j \in G_i^t} |\mathcal{P}_j|$ 
8:   end if
9:    $\mathbf{v}^t = \frac{(v_1^t, v_2^t, \dots, v_{2^C}^t)}{\sum_j v_j^t}$  ▷ Selection probabilities
10:  for  $i = 1$  to  $S$  do
11:     $(G_i^t, G_{i+1}^t) \leftarrow \text{Selection}(\mathbf{v}^t, 2)$  ▷ Select DAGs
12:     $(G_i^{t+1}, G_{i+1}^{t+1}) \leftarrow \text{Crossover}(G_i^t, G_{i+1}^t)$ 
13:     $G_i^{t+1} \leftarrow \text{Mutate}(G_i^{t+1}, r)$ 
14:     $G_{i+1}^{t+1} \leftarrow \text{Mutate}(G_{i+1}^{t+1}, r)$ 
15:     $G_i^{t+1} \leftarrow \Pi_{\sim}(G_i^{t+1}); G_{i+1}^{t+1} \leftarrow \Pi_{\sim}(G_{i+1}^{t+1})$ 
16:  end for
17: end for
18: Return the  $\hat{G}$  corresponding to  $v_{\max} = \max_{t \in [T], j \in [2^C]} v_j^t$ 

```

---

## 156 2.3. Approximate Structure Learning

157 For large number of mutations the exhaustive search is infeasible. Here we propose a Genetic  
 158 Algorithm (**GA**) to approximate the global maximum to the log-likelihood function  $l$  for  $p > 30$ . The



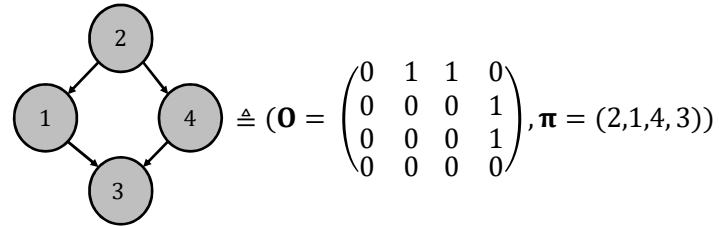

**Figure 3: DAG representation.** The DAG can be decomposed into an upper triangular matrix  $\mathbf{O}$  along with a permutation  $\pi$ .

159 pseudocode of this part is summarized in Algorithm 1.

### 160 2.3.1. Genetic Algorithm

161 Genetic algorithms searches for a global optimum using a “survival of the fittest” strategy. We  
 162 begin with a population of  $2C$  candidate solutions known as *chromosomes* and evolve them for  $T$   
 163 *generations*. Each chromosome is assigned a *fitness value*  $v$  which determines its quality. Then,  $S$   
 164 chromosome pairs are selected preferentially according to their fitness for reproduction. The next  
 165 generation forms by performing a *crossover operation* on chromosome pairs. In each generation,  
 166 there is a chance that a *mutation operation* changes chromosomes. In the setting of our model,  
 167 chromosomes at generation  $t$  are  $2C$  DAGs,  $\{G_i^t\}_{i=1}^{2C}$  and the fitness of each DAG is its maximum  
 168 likelihood value.

169 **Representation.** The most natural way to encode a DAG  $G$  is by using its adjacency matrix  
 170  $\mathbf{A}$ . However, perturbing the entries in  $\mathbf{A}$  may unintentionally introduce directed cycles into the  
 171 resulting graph. To avoid this problem, following [Carvalho, 2013](#), we represent  $G$  with a pair  $(\mathbf{O}, \pi)$ ,  
 172 where  $\mathbf{O}$  is the adjacency matrix for the *topological ordering* of  $G$  (i.e., an strictly upper triangular  
 173 matrix), and  $\pi$  is a permutation vector describing how the vertices of  $\mathbf{O}$  should be relabeled to  
 174 generate  $\mathbf{A}$ , Figure 3. We consider the ordering  $\mathbf{O}$  and permutation  $\pi$  as separate chromosomes  
 175 and evolve each of them individually. We can avoid introducing directed cycles by ensuring that  
 176 our genetic operators always return an upper triangular matrix.

177 **Operations.** Each crossover operation is defined to take in two DAGs and produce two offspring  
 178 to keep the generation size constant. The orderings and permutations are crossed over separately  
 179 (Supplement C). To maintain diversity in the population, we also define three mutation operators:  
 180 edge, branch, permutation (Supplement C).

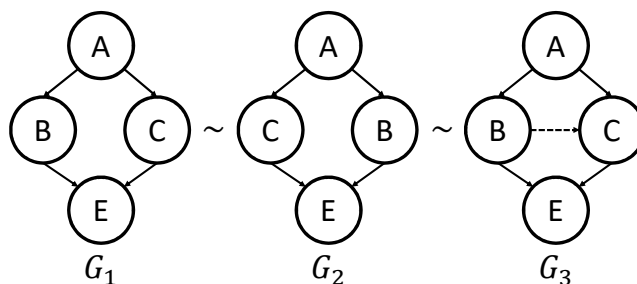

**Figure 4: Examples of DAGs from the same equivalence class and their canonical form.** For all  $\theta$  and  $\mathbf{x}$ ,  $\mathbb{P}(\mathbf{x}; \theta)$  is the same for all of the three network structures shown above.  $B$  and  $C$  are similar vertices in  $G_1$  and  $G_2$ . Edge  $B \rightarrow C$  is redundant in  $G_3$ . By uniquely labeling similar vertices and removing redundant edges we reach  $G_1$  as the canonical form of the other two DAGs.

### 181 2.3.2. Speeding up the GA with DAG Equivalence Classes

182 Since mutation  $i$  activates with probability  $\theta_i$  *irrespective* of which parent mutations are active,  
 183 many different network structures induce the same probability distribution over  $\{0, 1\}^p$ . We say  
 184 that  $G \sim G'$  if, for every  $\theta$  and  $\mathbf{x}$ ,  $\mathbb{P}(\mathbf{x}; G, \theta) = \mathbb{P}(\mathbf{x}; G', \theta)$ . It is clear that  $\sim$  defines an equivalence  
 185 relation over DAGs. To make the GA more efficient, we search only one DAG per equivalence  
 186 class by defining a *canonical form* for each graph. Figure 4 gives an example of equivalent net-  
 187 works. Algorithmically, we project back new solution graphs to the state space of canonical forms  
 188 by removing redundant edges and uniquely labeling similar vertices in function  $\Pi_{\sim}(\cdot)$  (line 12 of  
 189 Algorithm 1.) More details on mathematical properties of DBNs is presented in the Supplement D.

### 190 2.3.3. Controlling Complexity

191 To prevent overfitting, we consider two types of penalty to control the complexity of the learned  
 192 BN. First, if  $r = 0$  in Algorithm 1, we perform regularized MLE by using the Minimum Description  
 193 Length penalty introduced in (Lam and Bacchus, 1994) that simplifies to  $\log n \log p \sum_{j=1}^p |\mathcal{P}_j|$  for  
 194 the DBN. In another approach represented by  $r > 0$  in Algorithm 1, we limit the number of parents  
 195 of each node to  $r$ , i.e.,  $\max_j |\mathcal{P}_j| \leq r$ .

## 196 3. Results

### 197 3.1. Inferring Simulated Ground Truths

198 To test the DP method against existing cancer progression algorithms, we generate datasets  
 199 from simulated networks. Random graphs  $G$  are created using the PCALG R package (Kalisch

200 [et al., 2012](#)), which allows the user to specify the number of vertices and the average degree. For  
201 network parameters, we sample  $\theta_j \sim \text{Unif}(0.25, 0.75)$ . Once  $\theta_j$ s and  $G$  are known, a simulated  
202 dataset can be created by iterating over a topological sort of  $G$ . For tests on simulated data, we fix  
203 the number of observations  $n$  to be 400 and the number of alterations  $p$  to be 20 (this is similar to  
204 the size of existing cancer datasets). Unless specified otherwise, the average degree is set to 3.  
205 To simulate the noise that is likely present in real data, we flip the binary value of each entry with  
206 probability  $\eta$ .

207 If  $\hat{G} = (V, \hat{E})$  is the estimated network with ground truth  $G = (V, E)$ , one can define a false  
208 positive edge to be an edge  $e \in \hat{E}$  with  $e \notin E$  and false negative edges similarly. Since the number  
209 of possible false positives is likely much larger than the number of possible false negatives, we  
210 assess performance using Matthew's correlation coefficient (MCC), which is robust under uneven  
211 class sizes ([Matthews, 1975](#)). The MCC can be computed as

$$\text{MCC} = \frac{\text{TP} \times \text{TN} - \text{FP} \times \text{FN}}{\sqrt{(\text{TP} + \text{FP})(\text{TP} + \text{FN})(\text{TN} + \text{FP})(\text{TN} + \text{FN})}} \quad (4)$$

212 where TP (FP) is the number of true (false) positives and TN (FN) is the number of true (false)  
213 negatives. A MCC of 1 corresponds to perfect reconstruction, While an MCC of 0 means the  
214 algorithm is outputting a random network.

215 The DP algorithm requires that the spontaneous activation rate  $\varepsilon$  and in-degree bound  $k$  are  
216 chosen in advance. We suggest (and use) the following heuristic to set  $\varepsilon$ : set  $\varepsilon = f_m/2$ , where  $f_m$   
217 is the frequency of the *least* frequent alteration. One should always select  $\varepsilon < f_m$ , as otherwise  
218 there may be incentive to misplace the node corresponding to this alteration. In the interest of  
219 efficiency, we set  $k = 5$ , although in theory one could test every possible  $k$  to select the one  
220 that best trades expressivity for complexity. For pruning spurious edges, Fisher's exact test with  
221 significance level of  $10^{-5}$  is used.

222 First, we compare the DP algorithm to CBN. The original approach of [Gerstung et al. \(2009\)](#)  
223 uses simulated annealing to approximate the network structure alongside a computationally ex-  
224 pensive expectation-maximization (EM) algorithm for parameter estimation. As a result, their  
225 method is only applicable when the number of mutations is less than 12. [Montazeri et al. \(2016a\)](#)  
226 addresses this issue by developing an efficient Monte Carlo algorithm, named MC-CBN, to esti-  
227 mate the parameters and structure of a CBN. Figure 5A compares MC-CBN and the DP algorithm  
228 for various choices of  $\eta \in [0, 0.2]$ . In the case of low error ( $\eta \approx 0$ ) both methods are extremely  
229 accurate. However, as  $\eta$  becomes larger, the MCC for MC-CBN drops to 0 at a faster rate.

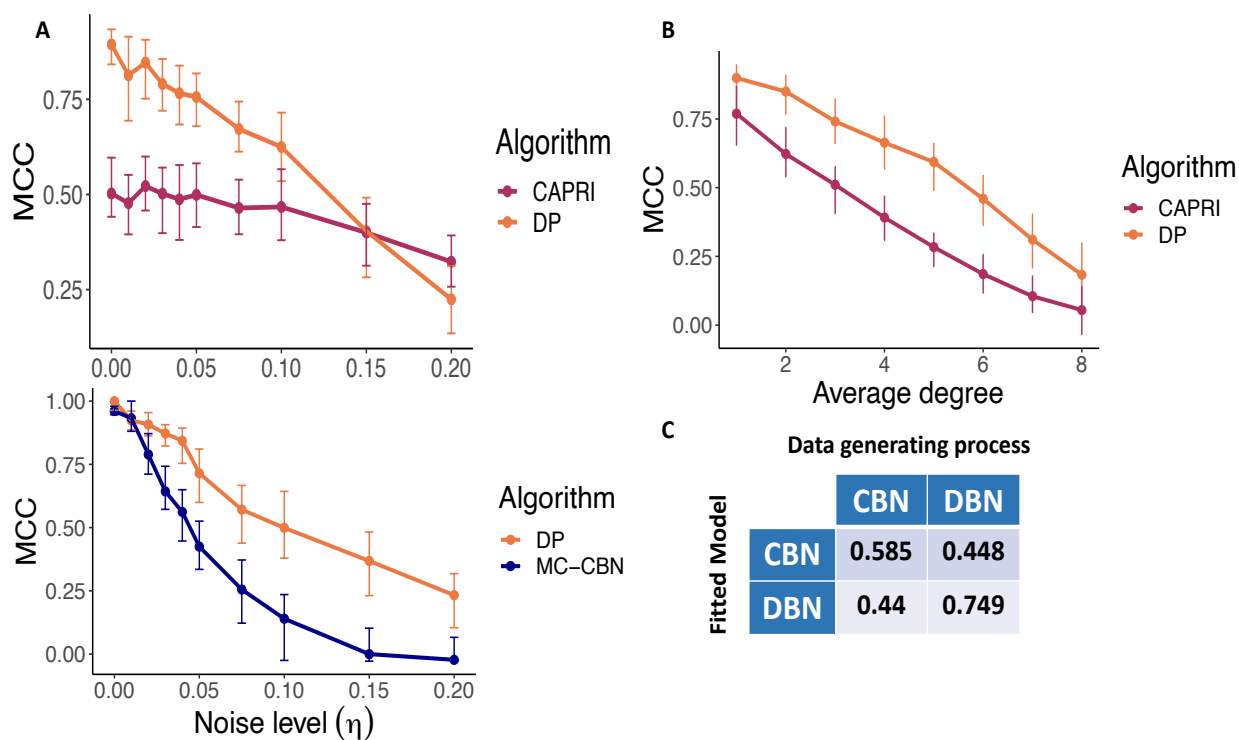

**Figure 5: Comparison to existing cancer progression algorithms on simulated data.** **A.** Comparing the DP algorithm to CAPRI and MC-CBN for various noise rates. For each value of  $\eta$ , 100 datasets were generated. Points represent the median MCC over all trials and error bars give interquartile range. **B.** Comparing the DP algorithm to CAPRI for various levels of network complexity. Network complexity was quantified by varying the average degree of random graphs from 1 to 8. 100 datasets for each degree were generated. **C.** Cross-comparison between DBN and CBN. 100 datasets were generated from the CBN model and 100 datasets were generated from the DBN model. Then the DBN and CBN models were fitted to all of the datasets, and the mean MCC in each class are reported.

|             | # of samples | # of drivers | # of frequent drivers |
|-------------|--------------|--------------|-----------------------|
| <b>SKCM</b> | 467          | 20           | 15                    |
| <b>LUAD</b> | 567          | 24           | 14                    |
| <b>BLCA</b> | 414          | 45           | 31                    |

**Table 1:** Number of samples ( $n$ ), number of driver mutations, and number of frequent driver mutations (5% frequency cutoff threshold) ( $p$ ) for the three used TCGA cancer types.

230 Next, we compare the DP algorithm to CAPRI (Ramazzotti et al., 2015). CAPRI is a flexible  
231 framework for inferring cancer progression networks which can account for many types of inter-  
232 actions between nodes. CAPRI first applies a constraint-based algorithm to obtain a *prima facie*  
233 network, and then applies a local search algorithm to prune spurious edges. CAPRI is available  
234 through TRONCO De Sano et al. (2016). Figure 5A compares the ability of CAPRI and the DP  
235 algorithm to recover networks with various levels of noise. To understand how the algorithms per-  
236 form as network complexity increases, Figure 5B varies the average degree while keeping the  
237 noise constant at  $\eta = 0.05$ .

238 Finally, we perform a cross-comparison of the CBN and DBN models. To do this, we simulate  
239 100 datasets from the CBN model and 100 datasets from the DBN model. We fit the DBN model  
240 to the CBN datasets and vice versa. Figure 5C reports the mean MCC in each category.

### 241 3.2. Real Data Experiment

242 We use our method to recover the order of *driver* mutations in three cancer types from The  
243 Cancer Genome Atlas (TCGA) program (Cancer Genome Atlas Research Network et al., 2013).  
244 We selected Skin Cutaneous Melanoma (SKCM) and Lung Adenocarcinoma (LUAD) because  
245 there are known molecular subtypes and mutual exclusivity relationships characterized for them.  
246 To determine the driver mutations, we used results from (Bailey et al., 2018) where 26 computa-  
247 tional methods had been applied to the TCGA data. The number of resulted driver mutations for  
248 SKCM and LUAD are below 30 and therefore exact DP method of Section 2.2 is applicable. We  
249 chose the Bladder Cancer (BLCA) for our third experiment since it has the highest driver mutation  
250 rate per sample in the TCGA data set (Bailey et al., 2018) and therefore is suitable to check the  
251 scalability of our proposed genetic algorithm. Number of samples, driver mutations, and frequent  
252 driver mutations (5% frequency cutoff threshold) for each cancer type is listed in Table 1.

253 To quantify our uncertainty in the estimated progression network, we run the algorithm on 100

254 bootstrapped datasets. We form the *mean graph* by only reporting the edges that are present in a  
255 sufficiently large number of networks estimated from the bootstrapped datasets (this cutoff will be  
256 25 or 50).

### 257 3.2.1. Progression of Mutations in Cutaneous Melanoma and Lung Adenocarcinoma

258 We run the DP method of the OncoBN package on 100 bootstrapped datasets with the in-  
259 degree bound of  $k = 3$  and fixed universal spontaneous activation probability of  $\varepsilon = 0.025$ . The  
260 mean progression network is illustrated in Figure 6. Note that out of 24 LUAD mutations, only 11  
261 of them are present in the mean progression network. This is because the rest of mutation are not  
262 connected with enough confident to the other nodes or to each others.

263 For SKCM, we recovered three root mutations with a high mean presence: *BRAF*, *NRAS*,  
264 and *COL5A1*. In the rest of the graph, two connections have highest confident: *BRAF*→*PTEN*  
265 and *MECOM*→*DDX3X*. The only mutation with multiple parents is *MECOM*. For LUAD, three high  
266 confident roots have been recovered: *KRAS*, *KEAP1*, and *EGFR* plus a high confident edge  
267 *TP53*→*RB1*. *STK11* and *ARID1A* each have two parents.

### 268 3.2.2. Progression of Mutations in Bladder Cancer

269 We run the GA of OncoBN package with  $2S = 100$  solutions for  $T = 300$  generations on 100  
270 bootstrap data sets. The mean progression network is illustrated in Figure 7. Out of  $p = 31$  nodes,  
271 only 18 are inferred in the mean progression network because the remaining 13 are not connected  
272 with enough confident to the rest or to each others.

273 We recover three root mutations with a high mean presence for the progression of bladder  
274 cancer: *TP53*, *KDM6A*, and *KMT2D*. From the several children of these roots, three have a mean  
275 presence greater than 50%: *RB1*, *STAG2*, and *KMT2C*. Finally, roots with meager mean pres-  
276 ence (*ELF3*, *ATM*, and *CREBBP*) and childless *PIK3CA* are mutations for which OncoBN can not  
277 find enough supporting evidence to place them in the main progression graph. Note that these  
278 placements are possible because of the flexibility of the spontaneous activation model.

## 279 4. Discussion

### 280 4.1. Simulation Study

281 Figure 5 shows that the DP algorithm outperforms existing cancer progression algorithms when  
282 the noise rate is small. For high noise rates ( $\eta \approx 0.2$ ), CAPRI is slightly more accurate. A future

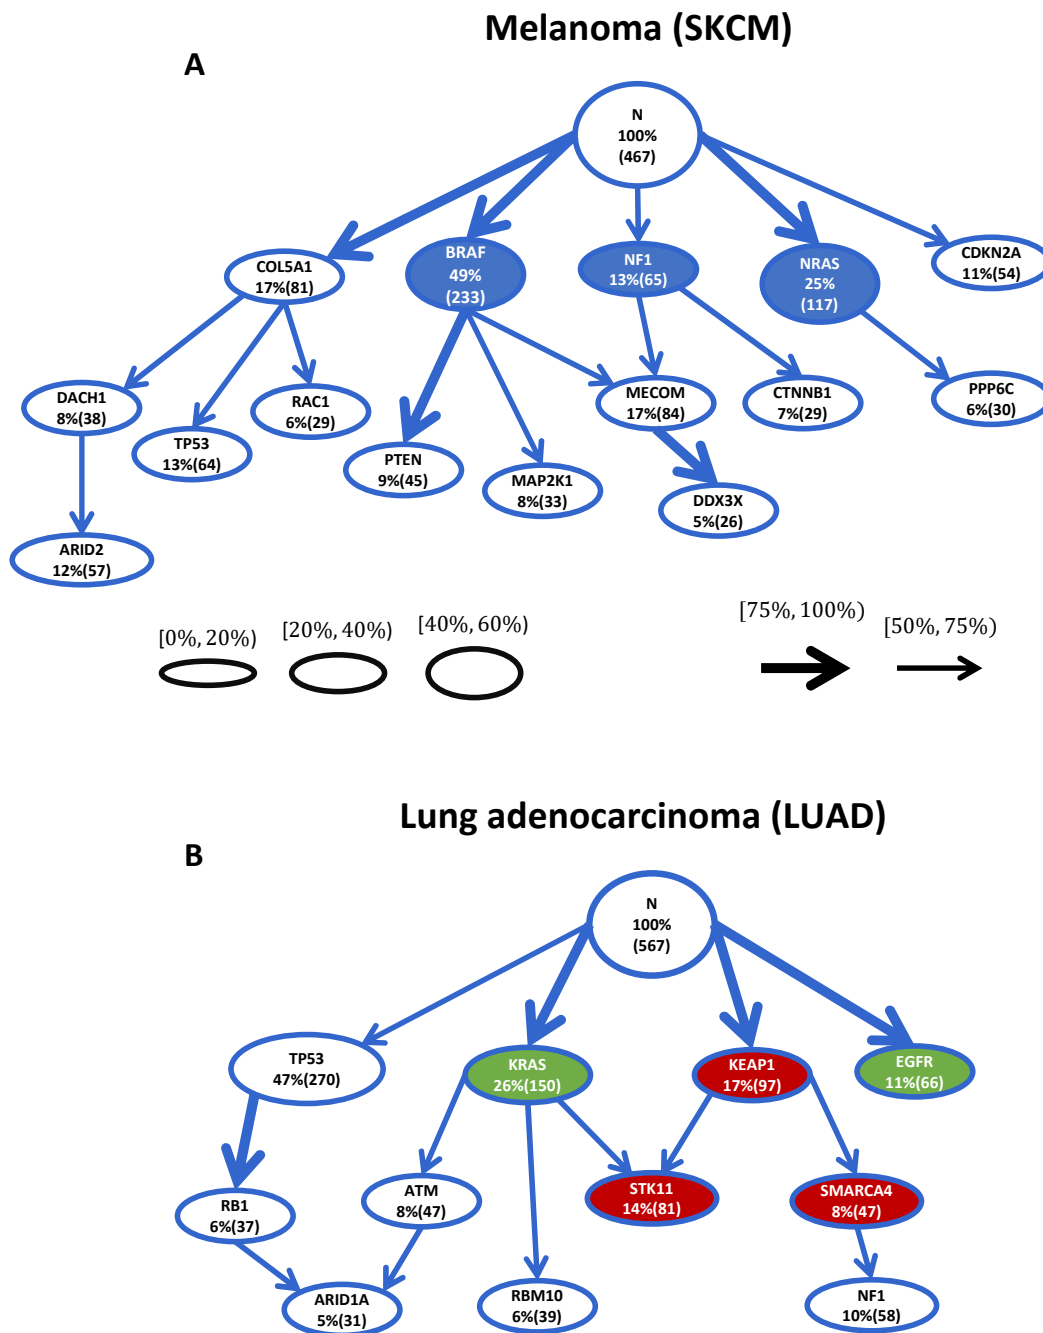

**Figure 6: Mutation progression networks of melanoma and lung adenocarcinoma inferred by the exact dynamic programming learning method. A.** We recover three known subtypes of melanoma (*BRAF*, *NRAS*, and *NF1* in blue) as separate roots. Mutations linked to metastasis such as *PTEN* and *DDX3X* are captured as late events. **B.** Synthetically lethal mutations of LUAD, *KRAS* and *EGFR* (green nodes), appear in disjoint branches. Frequently co-occurred mutations *STK11*, *KEAP1*, and *SMARCA4* occupy a branch of the inferred network (red nodes). Subtype defining mutations *TP53* and *RB1* are ordered with high confident.

283 improvement to the method could be to integrate some of CAPRI's regularization steps to improve  
284 robustness to noise. When  $\eta$  is small and fixed, DP uniformly outperforms CAPRI at different levels  
285 of network complexity (Figure 5B).

286 The cross-comparison (Figure 5C) shows that the DBN model is adequate even when the  
287 underlying data generating process assumes the CBN model. Although the CBN model performs  
288 slightly better when the data generating process assumes the CBN model (MCC 0.585 vs. MCC  
289 0.44), the DBN model is significantly better when the data generating process assumes the DBN  
290 model (MCC 0.749 vs. MCC 0.448).

## 291 4.2. Melanoma and Lung Adenocarcinoma

292 Inferred melanoma progression network captures multiple known characteristics of melanoma.  
293 Namely, there are three distinct known molecular subtypes for cutaneous melanoma with *BRAF*,  
294 *NRAS*, and *NF1* as biomarkers ([The Cancer Genome Atlas Network, 2015](#)). All three of these  
295 mutations are roots of our inferred progression network, which suggests that they are important  
296 early occurring events. Strong metastasis inducing cooperation of *PTEN* with *BRAF* ([Dankort  
297 et al., 2009](#)) is captured with *BRAF*→*PTEN*. *DDX3X* that is linked with metastasis in melanoma is  
298 captured as a late stage event ([Phung et al., 2019](#)).

299 In the inferred progression network of lung adenocarcinoma, synthetically lethal mutations  
300 *KRAS* and *EGFR* ([Unni et al., 2015](#)) appear as distinct roots. Moreover, *KRAS*, *KEAP1*, *STK11*,  
301 *SMARCA4*, and *NF1* form a subgraph. It is known that *KRAS*, *KEAP1*, *STK11* and *SMARCA4*  
302 cooccur in non-small cell lung cancers ([Schoenfeld et al., 2020](#)) and our algorithm suggests that  
303 *KRAS* and *KEAP1* are early events in those tumors.

## 304 4.3. Bladder Cancer

305 The recovered progression network for bladder cancer reflects existing biological research.  
306 First, bladder cancer is known to have two histologically different subtypes known as papillary and  
307 non-papillary ([Kamat et al., 2016](#)). Papillary tumors are finger-like, which start in the lining and  
308 grow toward the center of the bladder. Non-papillary tumors also initiate in the lining but are flat in  
309 shape. Both types can be muscle-invasive, which means the tumor has grown outward, escaped  
310 the lining, and infiltrated bladder muscles, or non-muscle invasive ([Kamat et al., 2016](#)). All of the  
311 bladder cases in TCGA are muscle-invasive, but papillary and non-papillary cases are not known.

312 There are known molecular signatures for papillary and non-papillary bladder cancers. Muta-  
313 tions in *TP53*, *RB1*, and *KMT2D* (green nodes in Figure 7) are very frequent in non-papillary sub-



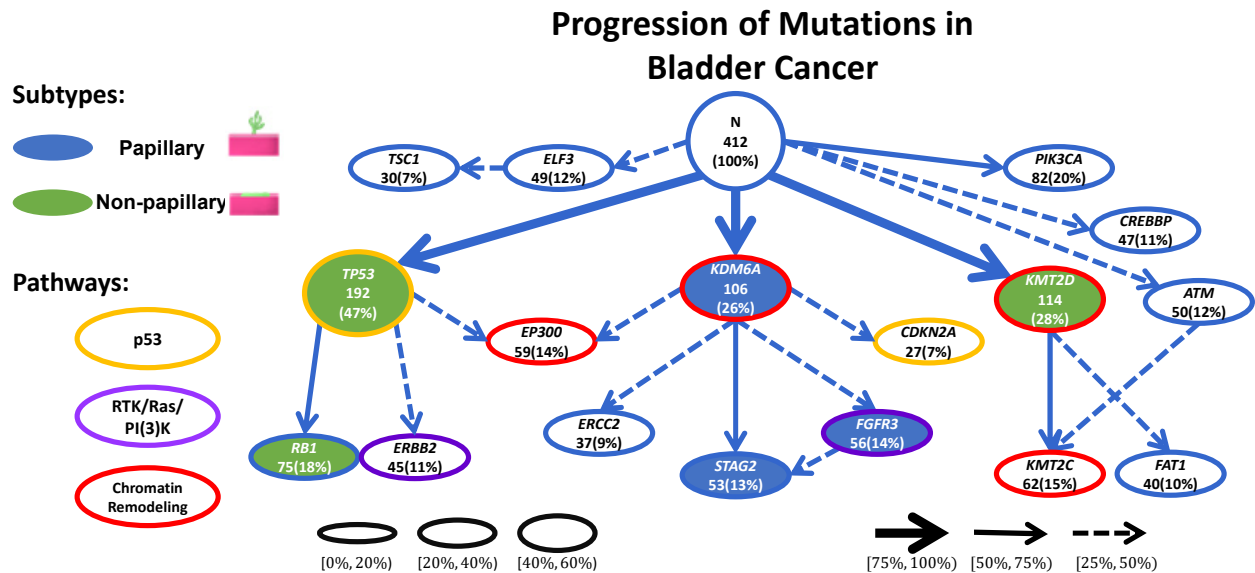

**Figure 7: Mutation progression network of bladder cancer inferred by OncoBN.** Focusing on the three high confidence roots (*TP53*, *KDM6A*, and *KMT2D*), the two subtypes of bladder cancer are clearly separated. The middle subgraph (rooted in *KDM6A*) is enriched for hallmark aberrations of the papillary subtype (blue nodes), and the other two subgraphs correspond to flat tumors (green nodes). Known mutual exclusive alteration pairs such as (*KDM6A*, *KMT2D*) and (*TP53*, *CDKN2A*) are occurring in different subgraphs. Four established highly perturbed pathways of bladder cancer are represented with varying outline colors. Each subtype has at least one mutated gene from these pathways in its subgraphs, therefore in both subtypes, all of the four pathways are perturbed.

314 type while *KDM6A*, *STAG2*, and *FGFR3* (blue nodes in Figure 7) are hallmarks of papillary tumors  
315 (Dinney et al., 2004; Cancer Genome Atlas Research Network, 2014; Gui et al., 2011; Solomon  
316 et al., 2013). Focusing on the high confident recovered roots (*TP53*, *KDM6A*, and *KMT2D*) and  
317 their descendants, our inferred network of Figure 7 shows separate progression paths for papillary  
318 and non-papillary subtypes. The middle sub-graph rooted at *KDM6A* contains *KDM6A*, *STAG2*,  
319 and *FGFR3* mutations and is mostly separated from the rest of the network. Therefore we can  
320 match it to the progression of the papillary subtype. Sub-graphs on the right and left of the fig-  
321 ure (rooted at *TP53* and *KMT2D*) are enriched with molecular hallmarks of non-papillary subtype.  
322 Our result shows the ability of OncoBN to infer the cancer progression network while maintaining  
323 subtype-specific biology.

324 In addition, we know that usually single perturbation of a pathway is enough for the manifesta-  
325 tion of a cancer hallmark. Therefore, another mutated gene in the same pathway does not confer  
326 a selective advantage. Thus, patterns of mutual exclusivity of cancer events arise among genes  
327 in the same pathways. In bladder cancer, high rate of alteration of p53/Rb, RTK/Ras/PI(3)K, and  
328 histone modification pathways are observed (Cancer Genome Atlas Research Network, 2014).  
329 Figure 7 highlights the corresponding pathways of genes with different outline color for each path-  
330 way. It confirms that the two subtypes (papillary and non-papillary) both have perturbation in p53,  
331 RTK/Ras/PI(3)K, methylation, and acetylation pathways. The only mutation that is shared between  
332 the two subtypes is *EP300*, which corresponds to acetylation.

## 333 References

- 334 Philipp M Altrock, Lin L Liu, and Franziska Michor. The mathematics of cancer: integrating quan-  
335 titative models. *Nat. Rev. Cancer*, 15(12):730–745, December 2015.
- 336 Matthew H Bailey, Collin Tokheim, Eduard Porta-Pardo, Sohini Sengupta, Denis Bertrand, Amila  
337 Weerasinghe, Antonio Colaprico, Michael C Wendl, Jaegil Kim, Brendan Reardon, Patrick  
338 Kwok-Shing Ng, Kang Jin Jeong, Song Cao, Zixing Wang, Jianjiong Gao, Qingsong Gao, Fang  
339 Wang, Eric Minwei Liu, Loris Mularoni, Carlota Rubio-Perez, Niranjana Nagarajan, Isidro Cortés-  
340 Ciriano, Daniel Cui Zhou, Wen-Wei Liang, Julian M Hess, Venkata D Yellapantula, David Tam-  
341 borero, Abel Gonzalez-Perez, Chayaporn Suphavilai, Jia Yu Ko, Ekta Khurana, Peter J Park,  
342 Eliezer M Van Allen, Han Liang, MC3 Working Group, Cancer Genome Atlas Research Net-  
343 work, Michael S Lawrence, Adam Godzik, Nuria Lopez-Bigas, Josh Stuart, David Wheeler, Gad

- 344 Getz, Ken Chen, Alexander J Lazar, Gordon B Mills, Rachel Karchin, and Li Ding. Compre-  
345 hensive characterization of cancer driver genes and mutations. *Cell*, 173(2):371–385.e18, April  
346 2018.
- 347 David Barber. *Bayesian reasoning and machine learning*. Cambridge University Press, 2012.
- 348 Niko Beerenwinkel, Jörg Rahnenführer, Martin Däumer, Daniel Hoffmann, Rolf Kaiser, Joachim  
349 Selbig, and Thomas Lengauer. Learning multiple evolutionary pathways from cross-sectional  
350 data. *J. Comput. Biol.*, 12(6):584–598, July 2005a.
- 351 Niko Beerenwinkel, Jörg Rahnenführer, Rolf Kaiser, Daniel Hoffmann, Joachim Selbig, and  
352 Thomas Lengauer. Mtreemix: a software package for learning and using mixture models of  
353 mutagenetic trees. *Bioinformatics*, 21(9):2106–2107, May 2005b.
- 354 Niko Beerenwinkel, Nicholas Eriksson, and Bernd Sturmfels. Conjunctive bayesian networks.  
355 *Bernoulli*, 13(4):893–909, November 2007.
- 356 Cancer Genome Atlas Research Network. Comprehensive molecular characterization of urothelial  
357 bladder carcinoma. *Nature*, 507(7492):315–322, March 2014.
- 358 Cancer Genome Atlas Research Network, John N Weinstein, Eric A Collisson, Gordon B Mills,  
359 Kenna R Mills Shaw, Brad A Ozenberger, Kyle Ellrott, Ilya Shmulevich, Chris Sander, and  
360 Joshua M Stuart. The cancer genome atlas Pan-Cancer analysis project. *Nat. Genet.*, 45  
361 (10):1113–1120, October 2013.
- 362 Giulio Caravagna, Alex Graudenzi, Daniele Ramazzotti, Rebeca Sanz-Pamplona, Luca De Sano,  
363 Giancarlo Mauri, Victor Moreno, Marco Antoniotti, and Bud Mishra. Algorithmic methods to infer  
364 the evolutionary trajectories in cancer progression. *Proc. Natl. Acad. Sci.*, 113(28):E4025–34,  
365 July 2016.
- 366 Arthur Carvalho. A cooperative coevolutionary genetic algorithm for learning bayesian network  
367 structures. May 2013.
- 368 Yu-Kang Cheng, Rameen Beroukhim, Ross L Levine, Ingo K Mellinghoff, Eric C Holland, and  
369 Franziska Michor. A mathematical methodology for determining the temporal order of pathway  
370 alterations arising during gliomagenesis. *PLoS Comput. Biol.*, 8(1):e1002337, January 2012.

- 371 Simona Cristea, Jack Kuipers, and Niko Beerenwinkel. pathTiMEx: Joint inference of mutually  
372 exclusive cancer pathways and their progression dynamics. *J. Comput. Biol.*, 24(6):603–615,  
373 June 2017.
- 374 Ibiayi Dagogo-Jack and Alice T. Shaw. Tumour heterogeneity and resistance to cancer therapies.  
375 *Nature Reviews Clinical Oncology*, 15(2):81–94, 2018.
- 376 David Dankort, David P. Curley, Robert A. Cartledge, Betsy Nelson, Anthony N. Karnezis,  
377 William E. Damsky, Mingjian J. You, Ronald A. DePinho, Martin McMahon, and Marcus Bosen-  
378 berg. Braf(V600E) cooperates with Pten loss to induce metastatic melanoma. *Nature Genetics*,  
379 41(5):544–552, 2009.
- 380 Alexander Davis, Ruli Gao, and Nicholas Navin. Tumor evolution: Linear, branching, neutral or  
381 punctuated? *Biochimica Et Biophysica Acta. Reviews on Cancer*, 1867(2):151–161, 2017.
- 382 Luca De Sano, Giulio Caravagna, Daniele Ramazzotti, Alex Graudenzi, Giancarlo Mauri, Bud  
383 Mishra, and Marco Antoniotti. TRONCO: an R package for the inference of cancer progression  
384 models from heterogeneous genomic data. *Bioinformatics*, 32(12):1911–1913, June 2016.
- 385 Yulan Deng, Shangyi Luo, Chunyu Deng, Tao Luo, Wenkang Yin, Hongyi Zhang, Yong Zhang,  
386 Xinxin Zhang, Yujia Lan, Yanyan Ping, Yun Xiao, and Xia Li. Identifying mutual exclusivity across  
387 cancer genomes: Computational approaches to discover genetic interaction and reveal tumor  
388 vulnerability. *Briefings in Bioinformatics*, 20(1):254–266, 2019.
- 389 R Desper, F Jiang, O P Kallioniemi, H Moch, C H Papadimitriou, and A A Schäffer. Inferring tree  
390 models for oncogenesis from comparative genome hybridization data. *J. Comput. Biol.*, 6(1):  
391 37–51, 1999.
- 392 Colin P N Dinney, David J McConkey, Randall E Millikan, Xifeng Wu, Menashe Bar-Eli, Liana  
393 Adam, Ashish M Kamat, Arlene O Siefker-Radtke, Tomasz Tuziak, Anita L Sabichi, H Barton  
394 Grossman, William F Benedict, and Bogdan Czerniak. Focus on bladder cancer. *Cancer Cell*,  
395 6(2):111–116, August 2004.
- 396 Hossein Shahrabi Farahani and Jens Lagergren. Learning Oncogenetic Networks by Reducing to  
397 Mixed Integer Linear Programming. *PLOS ONE*, 8(6):e65773, 2013.
- 398 E R Fearon and B Vogelstein. A genetic model for colorectal tumorigenesis. *Cell*, 61(5):759–767,  
399 June 1990.

- 400 Moritz Gerstung, Michael Baudis, Holger Moch, and Niko Beerenwinkel. Quantifying cancer pro-  
401 gression with conjunctive bayesian networks. *Bioinformatics*, 25(21):2809–2815, November  
402 2009.
- 403 Moritz Gerstung, Nicholas Eriksson, Jimmy Lin, Bert Vogelstein, and Niko Beerenwinkel. The  
404 temporal order of genetic and pathway alterations in tumorigenesis. *PLoS One*, 6(11):e27136,  
405 November 2011.
- 406 Moritz Gerstung, Clemency Jolly, Ignaty Leshchiner, Stefan C. Dentro, Santiago Gonzalez, Daniel  
407 Rosebrock, Thomas J. Mitchell, Yulia Rubanova, Pavana Anur, Kaixian Yu, Maxime Tara-  
408 bichi, Amit Deshwar, Jeff Wintersinger, Kortine Kleinheinz, Ignacio Vázquez-García, Kerstin  
409 Haase, Lara Jerman, Subhajit Sengupta, Geoff Macintyre, Salem Malikic, Nilgun Donmez,  
410 Dimitri G. Livitz, Marek Cmero, Jonas Demeulemeester, Steven Schumacher, Yu Fan, Xiao-  
411 tong Yao, Juhee Lee, Matthias Schlesner, Paul C. Boutros, David D. Bowtell, Hongtu Zhu, Gad  
412 Getz, Marcin Imielinski, Rameen Beroukhim, S. Cenk Sahinalp, Yuan Ji, Martin Peifer, Florian  
413 Markowitz, Ville Mustonen, Ke Yuan, Wenyi Wang, Quaid D. Morris, Paul T. Spellman, David C.  
414 Wedge, and Peter Van Loo. The evolutionary history of 2,658 cancers. *Nature*, 578(7793):  
415 122–128, 2020.
- 416 Yaoting Gui, Guangwu Guo, Yi Huang, Xueda Hu, Aifa Tang, Shengjie Gao, Renhua Wu, Chao  
417 Chen, Xianxin Li, Liang Zhou, Minghui He, Zesong Li, Xiaojuan Sun, Wenlong Jia, Jinnong  
418 Chen, Shangming Yang, Fangjian Zhou, Xiaokun Zhao, Shengqing Wan, Rui Ye, Chaozhao  
419 Liang, Zhisheng Liu, Peide Huang, Chunxiao Liu, Hui Jiang, Yong Wang, Hancheng Zheng,  
420 Liang Sun, Xingwang Liu, Zhimao Jiang, Dafei Feng, Jing Chen, Song Wu, Jing Zou, Zhongfu  
421 Zhang, Ruilin Yang, Jun Zhao, Congjie Xu, Weihua Yin, Zhichen Guan, Jiongqian Ye, Hong  
422 Zhang, Jingxiang Li, Karsten Kristiansen, Michael L Nickerson, Dan Theodorescu, Yingrui Li,  
423 Xiuqing Zhang, Songgang Li, Jian Wang, Huanming Yang, Jun Wang, and Zhiming Cai. Fre-  
424 quent mutations of chromatin remodeling genes in transitional cell carcinoma of the bladder.  
425 *Nat. Genet.*, 43(9):875–878, August 2011.
- 426 Douglas Hanahan and Robert A. Weinberg. Hallmarks of Cancer: The Next Generation. *Cell*, 144  
427 (5):646–674, 2011. ISSN 0092-8674, 1097-4172. doi: 10.1016/j.cell.2011.02.013.
- 428 Markus Kalisch, Martin Mächler, Diego Colombo, Marloes H Maathuis, and Peter Bühlmann.

- 429 Causal inference using graphical models with the r package pcalg. *Journal of Statistical Soft-*  
430 *ware*, 47(11):1–26, 2012.
- 431 Ashish M Kamat, Noah M Hahn, Jason A Efstathiou, Seth P Lerner, Per-Uno Malmström, Woony-  
432 oung Choi, Charles C Guo, Yair Lotan, and Wassim Kassouf. Bladder cancer. *The Lancet*, 388  
433 (10061):2796–2810, December 2016.
- 434 Daphne Koller and Nir Friedman. *Probabilistic graphical models: principles and techniques*. MIT  
435 press, 2009.
- 436 Wai Lam and Fahiem Bacchus. LEARNING BAYESIAN BELIEF NETWORKS: AN APPROACH  
437 BASED ON THE MDL PRINCIPLE. *Comput. Intell.*, 10(3):269–293, August 1994.
- 438 Mark D M Leiserson, Hsin-Ta Wu, Fabio Vandin, and Benjamin J Raphael. CoMET: a statistical  
439 approach to identify combinations of mutually exclusive alterations in cancer. *Genome Biol.*, 16:  
440 160, August 2015.
- 441 Brian W Matthews. Comparison of the predicted and observed secondary structure of t4 phage  
442 lysozyme. *Biochimica et Biophysica Acta (BBA)-Protein Structure*, 405(2):442–451, 1975.
- 443 Hesam Montazeri, Jack Kuipers, Roger Kouyos, Jürg Böni, Sabine Yerly, Thomas Klimkait, Vincent  
444 Aubert, Huldrych F Günthard, Niko Beerenwinkel, and Swiss HIV Cohort Study. Large-scale  
445 inference of conjunctive bayesian networks. *Bioinformatics*, 32(17):i727–i735, 2016a.
- 446 Hesam Montazeri, Jack Kuipers, Roger Kouyos, Jürg Böni, Sabine Yerly, Thomas Klimkait, Vincent  
447 Aubert, Huldrych F Günthard, Niko Beerenwinkel, and Swiss HIV Cohort Study. Large-scale in-  
448 ference of conjunctive bayesian networks. *Bioinformatics*, 32(17):i727–i735, September 2016b.
- 449 Loes Olde Loohuis, Giulio Caravagna, Alex Graudenzi, Daniele Ramazzotti, Giancarlo Mauri,  
450 Marco Antoniotti, and Bud Mishra. Inferring tree causal models of cancer progression with  
451 probability raising. *PLoS One*, 9(10):e108358, October 2014.
- 452 Bengt Phung, Maciej Cieřła, Adriana Sanna, Nicola Guzzi, Giulia Beneventi, Phuong Cao Thi  
453 Ngoc, Martin Lauss, Rita Cabrita, Eugenia Cordero, Ana Bosch, Frida Rosengren, Jari  
454 Häkkinen, Klaus Griewank, Annette Paschen, Katja Harbst, Haakan Olsson, Christian Ingvar,  
455 Ana Carneiro, Hensin Tsao, Dirk Schadendorf, Kristian Pietras, Cristian Bellodi, and Göran  
456 Jönsson. The X-Linked DDX3X RNA Helicase Dictates Translation Reprogramming and Metas-  
457 tasis in Melanoma. *Cell Reports*, 27(12):3573–3586.e7, 2019.

- 458 Daniele Ramazzotti, Giulio Caravagna, Loes Olde Loohuis, Alex Graudenzi, Ilya Korsunsky, Gian-  
459 carlo Mauri, Marco Antoniotti, and Bud Mishra. CAPRI: efficient inference of cancer progression  
460 models from cross-sectional data. *Bioinformatics*, 31(18):3016–3026, September 2015.
- 461 Daniele Ramazzotti, Alex Graudenzi, Giulio Caravagna, and Marco Antoniotti. Modeling cumu-  
462 lative biological phenomena with Suppes-Bayes causal networks. *Evol. Bioinform. Online*, 14:  
463 1176934318785167, July 2018.
- 464 Benjamin J Raphael and Fabio Vandin. Simultaneous inference of cancer pathways and tumor  
465 progression from cross-sectional mutation data. *J. Comput. Biol.*, 22(6):510–527, June 2015.
- 466 Adam J. Schoenfeld, Chai Bandlamudi, Jessica A. Lavery, Joseph Montecalvo, Azadeh Namaky-  
467 doust, Hira Rizvi, Jacklynn Egger, Carla P. Concepcion, Sonal Paul, Maria E. Arcila, Yahya  
468 Daneshbod, Jason Chang, Jennifer L. Sauter, Amanda Beras, Marc Ladanyi, Tyler Jacks,  
469 Charles M. Rudin, Barry S. Taylor, Mark T. A. Donoghue, Glenn Heller, Matthew D. Hellmann,  
470 Natasha Rekhtman, and Gregory J. Riely. The Genomic Landscape of SMARCA4 Alterations  
471 and Associations with Outcomes in Patients with Lung Cancer. *Clinical Cancer Research*, 26  
472 (21):5701–5708, 2020.
- 473 Tomi Silander and Petri Myllymäki. A simple approach for finding the globally optimal Bayesian  
474 network structure. In *Proceedings of the Twenty-Second Conference on Uncertainty in Artificial*  
475 *Intelligence*, pages 445–452, 2006.
- 476 David A Solomon, Jung-Sik Kim, Jolanta Bondaruk, Shahrokh F Shariat, Zeng-Feng Wang, Ab-  
477 del G Elkahloun, Tomoko Ozawa, Julia Gerard, Dazhong Zhuang, Shizhen Zhang, Neema  
478 Navai, Arlene Siefker-Radtke, Joanna J Phillips, Brian D Robinson, Mark A Rubin, Björn Volk-  
479 mer, Richard Hautmann, Rainer Küfer, Pancras C W Hogendoorn, George Netto, Dan Theodor-  
480 escu, C David James, Bogdan Czerniak, Markku Miettinen, and Todd Waldman. Frequent trun-  
481 cating mutations of STAG2 in bladder cancer. *Nat. Genet.*, 45(12):1428–1430, December 2013.
- 482 The Cancer Genome Atlas Network. Genomic Classification of Cutaneous Melanoma. *Cell*, 161  
483 (7):1681–1696, 2015.
- 484 Arun M Unni, William W Lockwood, Kreshnik Zejnullahu, Shih-Queen Lee-Lin, and Harold Varmus.  
485 Evidence that synthetic lethality underlies the mutual exclusivity of oncogenic KRAS and EGFR  
486 mutations in lung adenocarcinoma. *eLife*, 4:e06907, 2015.
